# Supplementary material for: Phylogenetic Structure and Sequential Dominance of Sub-Lineages of PRRSV Type-2 Lineage 1 in the United States
Source: MDPI journal article supplement (doi:10.3390/vaccines9060608), 2021-06-05
Supplement: s1 [file s1]

Table S1

| RFLP   | Sub-lineage |     |      |        |        |    |      |     |     |
|--------|-------------|-----|------|--------|--------|----|------|-----|-----|
|        | 1A          | 1B  | 1C   | 1Dalfa | 1Dbeta | 1E | 1F   | 1G  | 1H  |
| 1-8-4  | 4           | 0   | 7    | 7      | 30     | 0  | 1225 | 0   | 416 |
| 1-4-4  | 211         | 0   | 1063 | 63     | 0      | 0  | 51   | 0   | 44  |
| 1-26-2 | 0           | 12  | 0    | 0      | 0      | 0  | 0    | 683 | 0   |
| 1-7-4  | 640         | 0   | 11   | 0      | 0      | 0  | 0    | 0   | 0   |
| 1-18-2 | 0           | 428 | 0    | 0      | 0      | 0  | 0    | 156 | 0   |
| 1-3-4  | 3           | 0   | 257  | 4      | 4      | 7  | 2    | 0   | 3   |
| 1-4-2  | 14          | 0   | 44   | 93     | 1      | 1  | 33   | 0   | 1   |
| 1-4-3  | 9           | 0   | 97   | 19     | 0      | 0  | 1    | 0   | 3   |
| 1-3-2  | 0           | 0   | 21   | 19     | 0      | 76 | 5    | 6   | 0   |
| 1-18-4 | 0           | 113 | 0    | 0      | 0      | 0  | 0    | 0   | 0   |
| 1-2-4  | 3           | 15  | 70   | 5      | 0      | 0  | 18   | 0   | 1   |
| 1-16-4 | 0           | 0   | 0    | 0      | 1      | 0  | 104  | 0   | 1   |
| 1-8-2  | 0           | 0   | 0    | 77     | 3      | 0  | 18   | 0   | 6   |
| 1-37-2 | 0           | 1   | 0    | 0      | 0      | 0  | 0    | 102 | 0   |
| 1-8-3  | 0           | 0   | 3    | 18     | 7      | 0  | 35   | 0   | 13  |
| 1-12-4 | 0           | 0   | 1    | 0      | 4      | 0  | 48   | 0   | 17  |
| 1-22-2 | 0           | 0   | 0    | 0      | 0      | 61 | 0    | 0   | 0   |
| 1-7-2  | 54          | 0   | 0    | 5      | 0      | 0  | 0    | 0   | 0   |
| 1-13-2 | 7           | 13  | 4    | 0      | 0      | 0  | 3    | 14  | 0   |
| 1-26-4 | 0           | 10  | 0    | 0      | 0      | 0  | 0    | 22  | 0   |
| 1-2-2  | 7           | 11  | 1    | 7      | 2      | 0  | 1    | 3   | 0   |
| 1-7-3  | 31          | 0   | 1    | 0      | 0      | 0  | 0    | 0   | 0   |
| 2-5-2  | 0           | 0   | 0    | 26     | 0      | 0  | 0    | 0   | 0   |
| Others | 80          | 70  | 54   | 61     | 11     | 14 | 56   | 76  | 14  |

Table S2

| Sub-lineage | Run      | Substitution Rate | Sub-lineage | Run      | Substitution Rate |
|-------------|----------|-------------------|-------------|----------|-------------------|
| L1A         | combined | 7.72E-03          | L1E         | combined | NA                |
| L1A         | 1        | 7.62E-03          | L1E         | 1        | 8.47E-03          |
| L1A         | 2        | 7.89E-03          | L1E         | 2        | NA                |
| L1A         | 3        | 7.63E-03          | L1E         | 3        | NA                |
| L1B         | combined | 8.77E-03          | L1F         | combined | 6.95E-03          |
| L1B         | 1        | 8.49E-03          | L1F         | 1        | 7.48E-03          |
| L1B         | 2        | 9.05E-03          | L1F         | 2        | 7.06E-03          |
| L1B         | 3        | 8.76E-03          | L1F         | 3        | 6.47E-03          |
| L1C         | combined | 1.22E-02          | L1G         | combined | 1.09E-02          |
| L1C         | 1        | 1.17E-02          | L1G         | 1        | 1.02E-02          |
| L1C         | 2        | 1.23E-02          | L1G         | 2        | 1.12E-02          |
| L1C         | 3        | 1.25E-02          | L1G         | 3        | 1.11E-02          |
| L1Dalpha    | combined | 8.38E-03          | L1H         | combined | 9.37E-03          |
| L1Dalpha    | 1        | 8.48E-03          | L1H         | 1        | 9.08E-03          |
| L1Dalpha    | 2        | 8.74E-03          | L1H         | 2        | 9.00E-03          |
| L1Dalpha    | 3        | 7.91E-03          | L1H         | 3        | 9.98E-03          |
| L1Dbeta     | combined | NA                |             |          |                   |
| L1Dbeta     | 1        | 6.65E-03          |             |          |                   |
| L1Dbeta     | 2        | NA                |             |          |                   |
| L1Dbeta     | 3        | NA                |             |          |                   |

Table S3

| Lineage                         | L1A             | L1B            | L1C             | L1D            | L1Dalpha       | L1Dbeta       | L1E            | L1F             | L1G             | L1H            | L2            | L4           | L5              | L6            | L7            | L8              | L9              |
|---------------------------------|-----------------|----------------|-----------------|----------------|----------------|---------------|----------------|-----------------|-----------------|----------------|---------------|--------------|-----------------|---------------|---------------|-----------------|-----------------|
|                                 | <i>n</i> = 1095 | <i>n</i> = 683 | <i>n</i> = 1663 | <i>n</i> = 469 | <i>n</i> = 405 | <i>n</i> = 64 | <i>n</i> = 161 | <i>n</i> = 1600 | <i>n</i> = 1062 | <i>n</i> = 519 | <i>n</i> = 46 | <i>n</i> = 2 | <i>n</i> = 1116 | <i>n</i> = 73 | <i>n</i> = 18 | <i>n</i> = 1831 | <i>n</i> = 1469 |
| L1A                             | 4.0             |                |                 |                |                |               |                |                 |                 |                |               |              |                 |               |               |                 |                 |
| L1B                             | 6.9             | 5.0            |                 |                |                |               |                |                 |                 |                |               |              |                 |               |               |                 |                 |
| L1C                             | 10.1            | 10.0           | 7.0             |                |                |               |                |                 |                 |                |               |              |                 |               |               |                 |                 |
| L1D                             | 10.9            | 10.5           | 12.6            | 11.0           |                |               |                |                 |                 |                |               |              |                 |               |               |                 |                 |
| L1Dalpha                        | 11.2            | 10.7           | 13.1            | 10.6           | 10.0           |               |                |                 |                 |                |               |              |                 |               |               |                 |                 |
| L1Dbeta                         | 9.0             | 9.6            | 9.3             | 11.1           | 11.7           | 7.0           |                |                 |                 |                |               |              |                 |               |               |                 |                 |
| L1E                             | 13.4            | 12.5           | 13.2            | 14.2           | 14.3           | 13.6          | 5.0            |                 |                 |                |               |              |                 |               |               |                 |                 |
| L1F                             | 9.5             | 10.1           | 10.4            | 12.1           | 12.5           | 9.5           | 14.7           | 6.0             |                 |                |               |              |                 |               |               |                 |                 |
| L1G                             | 8.1             | 6.7            | 11.0            | 12.0           | 12.2           | 10.4          | 13.4           | 11.0            | 6.0             |                |               |              |                 |               |               |                 |                 |
| L1H                             | 9.0             | 10.5           | 9.3             | 11.5           | 12.1           | 7.9           | 14.7           | 9.7             | 11.2            | 4.0            |               |              |                 |               |               |                 |                 |
| L2                              | 14.5            | 14.4           | 15.4            | 14.4           | 14.4           | 14.5          | 16.0           | 14.5            | 15.7            | 14.4           | 13.0          |              |                 |               |               |                 |                 |
| L4                              | 14.6            | 14.6           | 17.1            | 15.1           | 14.9           | 15.9          | 18.9           | 16.4            | 15.8            | 16.5           | 17.9          | 16.0         |                 |               |               |                 |                 |
| L5                              | 15.1            | 15.4           | 17.3            | 14.2           | 13.9           | 16.1          | 17.7           | 17.3            | 16.6            | 16.2           | 14.4          | 15.6         | 5.0             |               |               |                 |                 |
| L6                              | 19.2            | 18.6           | 19.4            | 17.6           | 17.3           | 19.4          | 19.1           | 20.0            | 19.9            | 18.9           | 16.8          | 20.1         | 14.6            | 7.0           |               |                 |                 |
| L7                              | 12.5            | 12.0           | 14.1            | 11.4           | 11.1           | 12.9          | 13.7           | 14.2            | 13.4            | 13.5           | 12.6          | 13.8         | 9.6             | 13.8          | 5.0           |                 |                 |
| L8                              | 13.4            | 13.5           | 14.9            | 12.5           | 12.3           | 14.1          | 16.4           | 15.3            | 15.4            | 14.0           | 13.8          | 15.4         | 11.9            | 14.6          | 9.4           | 6.0             |                 |
| L9                              | 15.6            | 15.3           | 16.5            | 13.8           | 13.4           | 15.9          | 17.3           | 16.6            | 16.7            | 16.0           | 14.4          | 17.0         | 13.1            | 15.4          | 11.1          | 10.6            | 10.0            |
| Prevacent - Elanco (L1)         | 11.7            | 11.9           | 11.7            | 12.8           | 13.4           | 8.4           | 14.2           | 11.0            | 12.6            | 9.5            | 15.7          | 17.5         | 17.0            | 21.9          | 13.7          | 15.9            | 17.7            |
| Ingelvac PRRSV MLV - BI (L5)    | 14.8            | 15.2           | 17.3            | 14.1           | 13.8           | 16.0          | 18.2           | 17.5            | 16.4            | 16.0           | 14.6          | 15.7         | 3.1             | 14.5          | 9.3           | 12.0            | 13.2            |
| Prime Pac PRRSV RR - Merck (L7) | 12.6            | 12.2           | 14.4            | 10.9           | 10.6           | 12.8          | 14.4           | 14.1            | 13.8            | 12.9           | 12.3          | 13.7         | 8.8             | 13.0          | 3.3           | 8.6             | 10.4            |
| Ingelvac PRRSV ATP - BI (L8)    | 12.8            | 13.1           | 14.7            | 11.9           | 11.6           | 13.7          | 15.8           | 14.8            | 15.1            | 13.4           | 13.3          | 14.6         | 10.8            | 14.1          | 8.6           | 4.3             | 10.0            |
| Fostera PRRSV - Zoetis (L8)     | 14.6            | 13.9           | 16.3            | 12.2           | 11.8           | 14.9          | 17.6           | 16.0            | 15.3            | 15.4           | 13.8          | 15.7         | 10.1            | 12.8          | 7.8           | 7.3             | 9.1             |
